# Supplementary material for: Inkjet-printed gas sensors: metal decorated WO3 nanoparticles and their gas sensing properties
Source: Royal Society of Chemistry journal article supplement (doi:10.1039/c2jm32499g), 2012-01-01
Supplement: c2jm32499g.pdf [file c2jm32499g.pdf]

Cite this: DOI: 10.1039/c0xx00000x

Supplementary material

www.rsc.org/materials

## Inkjet-Printed Gas sensors: Metal Decorated WO<sub>3</sub> Nanoparticles and Their Gas Sensing Properties

Jarmo Kukkola,<sup>a</sup> Melinda Mohl,<sup>a</sup> Anne-Riikka Leino,<sup>a</sup> Géza Tóth,<sup>a</sup> Ming-Chung Wu,<sup>bc</sup> Andrey Shchukarev,<sup>d</sup> Alexey Popov,<sup>e</sup> Jyri-Pekka Mikkola,<sup>df</sup> Janne Lauri,<sup>e</sup> Markus Riihimäki,<sup>g</sup> Jyrki Lappalainen,<sup>a</sup> Heli Jantunen<sup>a</sup> and Krisztián Kordás<sup>\*ad</sup>

Received (in XXX, XXX) Xth XXXXXXXXXX 20XX, Accepted Xth XXXXXXXXXX 20XX

DOI: 10.1039/b000000x

The recovery of Ag decorated WO<sub>3</sub> sensors was studied further by repeating the H<sub>2</sub> measurement with the same sample (at 220 °C), after the gas responses to H<sub>2</sub>, NO, CO, and H<sub>2</sub>S were studied (Fig. S1). The sensors were concluded to recover only partially from the H<sub>2</sub>S exposure.

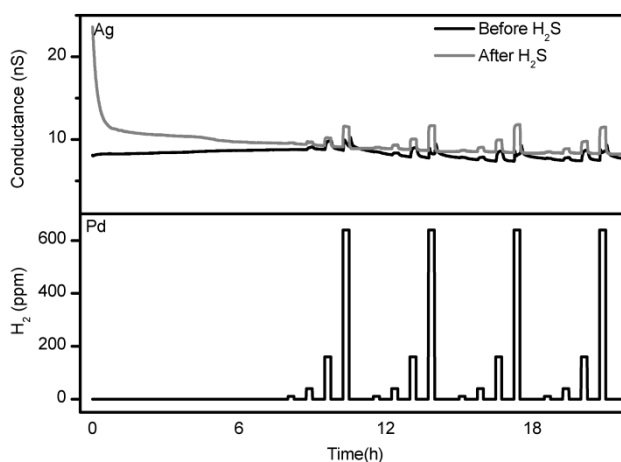

Fig. S1 Change in the conductance of the Ag decorated WO<sub>3</sub> nanoparticle based gas sensors when exposed to 10, 40, 160, and 640 ppm of H<sub>2</sub> in synthetic air carrier gas at 220 °C (before and after of H<sub>2</sub>S exposure). Please note: the conductance on y-axis is logarithmic.
